# Supplementary material for: Advanced glycation end-products, cardiac function and heart failure in the general population: The Rotterdam Study
Source: PubMed Central journal article supplement (PMC9892093; doi:10.1007/s00125-022-05821-3), 2022-11-08
Supplement: 125_2022_5821_MOESM1_ESM.pdf [file 125_2022_5821_MOESM1_ESM.pdf]

## Electronic Supplementary Material (ESM)

|                                                                                                                                                                                                         | Page |
|---------------------------------------------------------------------------------------------------------------------------------------------------------------------------------------------------------|------|
| <b>ESM Table 1</b> Association of skin autofluorescence (SAF) with echocardiographic parameters of left ventricular systolic and diastolic function in men and women                                    | 2    |
| <b>ESM Table 2</b> Association of skin autofluorescence (SAF) with prevalent heart failure, excluding participants with coronary heart disease                                                          | 4    |
| <b>ESM Table 3</b> Association of skin autofluorescence (SAF) with echocardiographic parameters of left ventricular systolic and diastolic function, excluding participants with coronary heart disease | 5    |
| <b>ESM Table 4</b> Association of skin autofluorescence (SAF) with echocardiographic parameters of left ventricular systolic and diastolic function after further adjustment for kidney function        | 6    |
| <b>ESM Table 5</b> Association of skin autofluorescence (SAF) with echocardiographic parameters of left ventricular systolic and diastolic function stratified by kidney function                       | 7    |
| <b>ESM Table 6</b> Comparison of the included study population and excluded participants                                                                                                                | 8    |
| <b>ESM Fig. 1</b> Distribution of skin autofluorescence (SAF) values in the study population                                                                                                            | 10   |
| <b>ESM Fig. 2</b> Association of skin autofluorescence (SAF) with parameters of left ventricular systolic and diastolic function in men and women by diabetes status                                    | 11   |

**ESM Table 1** Association of skin autofluorescence (SAF) with echocardiographic parameters of left ventricular systolic and diastolic function in men and women

| Outcomes    |                      | Men                  | Women                |
|-------------|----------------------|----------------------|----------------------|
|             |                      | $\beta$ (95%CI)      | $\beta$ (95%CI)      |
| LVEF        | Model 1 <sup>a</sup> | -1.75 (-2.54, -0.97) | -0.54(-1.11, 0.03)   |
|             | Model 2 <sup>b</sup> | -1.62 (-2.41, -0.83) | -0.41 (-0.99, 0.17)  |
| E/e'        | Model 1 <sup>a</sup> | 0.52 (0.12, 0.92)    | 0.06 (-0.36, 0.48)   |
|             | Model 2 <sup>b</sup> | 0.44 (0.03, 0.85)    | -0.09 (-0.52, 0.34)  |
| E/A         | Model 1 <sup>a</sup> | 0.02 (-0.02, 0.05)   | 0.001 (-0.03, 0.03)  |
|             | Model 2 <sup>b</sup> | 0.02 (-0.02, 0.05)   | -0.003 (-0.03, 0.03) |
| LA diameter | Model 1 <sup>a</sup> | 0.67 (-0.01, 1.35)   | -0.04 (-0.63, 0.56)  |
|             | Model 2 <sup>b</sup> | 0.39 (-0.27, 1.05)   | -0.16 (-0.72, 0.40)  |
| LVM index   | Model 1 <sup>a</sup> | 0.11 (-2.95, 3.16)   | -2.16 (-4.77, 0.45)  |
|             | Model 2 <sup>b</sup> | -0.29 (-3.44, 2.85)  | -1.91 (-4.50, 0.69)  |

Mean differences ( $\beta$ ) (95% CI) for one unit increase in SAF were calculated using linear regressions

Model 1 adjusted for age and sex (in the overall population)

Model 2 adjusted for age, sex (in the overall population), CHD, type 2 diabetes, hypertension, smoking status, waist circumference, monthly income and physical activity

The number of individuals with available data on outcomes in the overall population was 2328 for LVEF, 2295 for E/e', 2295 for E/e', 2307 for E/A, 2343 for LA diameter and 1181 for LVM index

LVEF: Left ventricular ejection fraction, E/e': E wave/ septal e' ratio, E/A; mitral E wave/ A wave ratio, LA diameter: left atrial diameter, LVM index; left ventricular mass index

**ESM Table 2** Association of skin autofluorescence (SAF) with prevalent heart failure, excluding participants with coronary heart disease

|                      | Overall population | Men               | Women             |
|----------------------|--------------------|-------------------|-------------------|
|                      | OR (95% CI)        | OR (95% CI)       | OR (95% CI)       |
| Model 1 <sup>a</sup> | 2.76 (1.69, 4.35)  | 1.81 (1.68, 8.37) | 4.02 (2.02, 7.71) |
| Model 2 <sup>b</sup> | 2.81 (1.65, 4.73)  | 1.60 (0.69, 3.56) | 4.39 (2.15, 8.97) |

Odds ratios (OR) (95% CI) of prevalent heart failure for one unit increase in SAF were calculated using logistic regressions

<sup>a</sup>Model 1: adjusted for age, sex (in the overall population)

<sup>b</sup>Model 2 adjusted for age, sex (in the overall population), CHD, type 2 diabetes, hypertension, smoking status, waist circumference, monthly income and physical activity

The number of individuals in the analyses were 2426 in the overall population, 1018 men and 1408 women

**ESM Table 3** Association of skin autofluorescence (SAF) with echocardiographic parameters of left ventricular systolic and diastolic function, excluding participants with coronary heart disease

| outcomes    | Overall population<br>$\beta$ (95%CI) | Men<br>$\beta$ (95%CI) | Women<br>$\beta$ (95%CI) |
|-------------|---------------------------------------|------------------------|--------------------------|
| LVEF        | -1.03 (-1.49, -0.56)                  | -1.58 (-2.36, -0.79)   | -0.57 (-1.15, 0.01)      |
| E/e'        | 0.03 (-0.28, 0.34)                    | 0.30 (-0.12, 0.73)     | -0.14 (-0.57, 0.30)      |
| E/A         | 0.004 (-0.02, 0.03)                   | 0.02 (-0.01, 0.06)     | -0.01 (-0.04, 0.02)      |
| LA diameter | 0.07 (-0.37, 0.51)                    | 0.55 (-0.17, 1.26)     | -0.22 (-0.79, 0.35)      |
| LVM index   | -1.54 (-3.62, 0.54)                   | -0.81 (-4.20, 2.58)    | -2.01 (-4.65, 0.63)      |

Mean difference ( $\beta$ ) (95% CI) for one unit increase in SAF was calculated using linear regressions adjusted for age, sex (in the overall population), hypertension, smoking status, waist circumference, monthly income and physical activity

LVEF: Left ventricular ejection fraction, E/e': E wave/ septal e' ratio, E/A; mitral E wave/ A wave ratio, LA diameter: left atrial diameter, LVM index; left ventricular mass index

**ESM Table 4** Association of skin autofluorescence (SAF) with echocardiographic parameters of left ventricular systolic and diastolic function after further adjustment for kidney function\*

| outcomes    | Overall population<br>$\beta$ (95%CI) | Men<br>$\beta$ (95%CI) | Women<br>$\beta$ (95%CI) |
|-------------|---------------------------------------|------------------------|--------------------------|
| LVEF        | -0.70 (-1.36, -0.05)                  | -0.79 (-1.88, 0.30)    | -0.60 (-1.41, 0.21)      |
| E/e'        | 0.14 (-0.20, 0.49)                    | 0.30 (-0.21, 0.80)     | 0.06 (-0.41, 0.53)       |
| E/A         | -0.01 (-0.04, 0.03)                   | -0.01 (-0.06, 0.05)    | -0.01 (-0.06, 0.04)      |
| LA diameter | -0.10 (-0.75, 0.54)                   | 0.39 (-0.63, 1.41)     | -0.53 (-1.37, 0.31)      |

Mean differences ( $\beta$ ) (95% CI) for one unit increase in SAF were calculated using linear regressions adjusted for age, sex (in the overall population), CHD, hypertension, smoking status, waist circumference, monthly income and physical activity and eGFR

\*The number of participants with available eGFR values for these analyses was 1085 (466 men and 619 women)

LVEF: Left ventricular ejection fraction, E/e': E wave/ septal e' ratio, E/A; mitral E wave/ A wave ratio, LA diameter: left atrial diameter, eGFR estimated glomerular filtration rate

**ESM Table 5** Association of skin autofluorescence (SAF) with echocardiographic parameters of left ventricular systolic and diastolic function stratified by kidney function

| outcomes    | eGFR<60                         |                      |                      |
|-------------|---------------------------------|----------------------|----------------------|
|             | Overall population<br>β (95%CI) | Men<br>β (95%CI)     | Women<br>β (95%CI)   |
| LVEF        | -0.89 (-2.04, 0.26)             | -0.49 (-1.91, 0.92)  | -1.44 (-3.63, 0.75)  |
| E/e'        | 0.43 (-0.12, 0.99)              | 0.52 (-0.15, 1.19)   | -0.002 (-0.12, 0.12) |
| E/A         | -0.01 (-0.07, 0.05)             | 0.003 (-0.07, 0.08)  | -0.02 (-0.12, 0.09)  |
| LA diameter | 0.04 (-1.04, 1.12)              | 0.48 (-0.82, 1.79)   | -1.22 (-3.31, 0.86)  |
| outcomes    | eGFR≥60                         |                      |                      |
|             | Overall population<br>β (95%CI) | Men<br>β (95%CI)     | Women<br>β (95%CI)   |
| LVEF        | -0.44 (-1.24, 0.37)             | -0.44 (-1.24, 0.37)  | -0.18 (-1.07, 0.71)  |
| E/e'        | -0.002 (-0.45, 0.44)            | -0.002 (-0.45, 0.44) | 0.02 (-0.51, 0.55)   |
| E/A         | -0.01 (-0.06, 0.04)             | -0.01 (-0.06, 0.04)  | -0.02 (-0.07, 0.04)  |
| LA diameter | -0.17 (-0.99, 0.65)             | -0.17 (-0.99, 0.65)  | -0.37 (-1.31, 0.57)  |

Mean differences (β) (95% CI) for one unit increase in SAF were calculated using linear regressions adjusted for age, sex (in the overall population), CHD, hypertension, smoking status, waist circumference, monthly income and physical activity

\*The number of participants with eGFR<60 ml/min per 1.73 m<sup>2</sup> was 428 and with eGFR≥60 ml/min per 1.73 m<sup>2</sup> was 663

LVEF: Left ventricular ejection fraction, E/e': E wave/ septal e' ratio, E/A; mitral E wave/ A wave ratio, LA diameter: left atrial diameter, LVM index; left ventricular mass index, eGFR estimated glomerular filtration rate

**ESM Table 6** Comparison of the included study population and excluded participants

| Variable                             | Excluded (n= 538) | Included (n= 2426) |
|--------------------------------------|-------------------|--------------------|
| Age, years                           | 77.1 (6.2)        | 71.9 (9.7)         |
| Women, n (%)                         | 290 (50)          | 1408 (58)          |
| Waist circumference, cm              | 97 (13)           | 94 (13)            |
| Hypertension, n (%)                  | 478 (82.6)        | 1694 (69.9)        |
| Type 2 diabetes, n (%)               | 38 (18.4)         | 357 (14.7)         |
| CHD, n (%)                           | 35 (17.0)         | 136 (5.6)          |
| Smoking, n (%)                       |                   |                    |
| Never                                | 199 (34.4)        | 793 (32.7)         |
| Current                              | 38 (6.6)          | 293 (12.1)         |
| Former                               | 342 (59.1)        | 1336 (55.2)        |
| Income, n (%)                        |                   |                    |
| <1200 €                              | 13 (2.2)          | 65 (2.7)           |
| 1200–2100 €                          | 81 (13.9)         | 376 (15.5)         |
| >2100 €                              | 489 (83.9)        | 1985 (81.8)        |
| Physical activity , METh/week        | 49.34 (47.2)      | 56.44 (53.2)       |
| eGFR, ml/min per 1.73 m <sup>2</sup> | 55.5 (15.6)       | 64.6 (14.4)        |
| LVEF, %                              | 63.8 (8.93)       | 67.4 (6.12)        |
| E/e'                                 | 11.93 (5.59)      | 9.75 (3.61)        |
| E/A                                  | 1.30 (0.86)       | 0.90 (0.27)        |
| LA diameter, mm                      | 47.78 (7.77)      | 41.62 (5.57)       |
| LVM index, g/m <sup>2</sup>          | 76.95 (20.04)     | 71.73 (18.37)      |
| SAF, AU                              | 2.53 (0.49)       | 2.38 (0.51)        |
| Prevalent heart failure, n (%)       | 45 (21.7)         | 64 (2.6)           |

Data are presented as mean (SD) or median (IQR) for continuous variables or as n (%) for dichotomous variables

**ESM Fig. 1** Distribution of skin autofluorescence (SAF) values in the overall study population

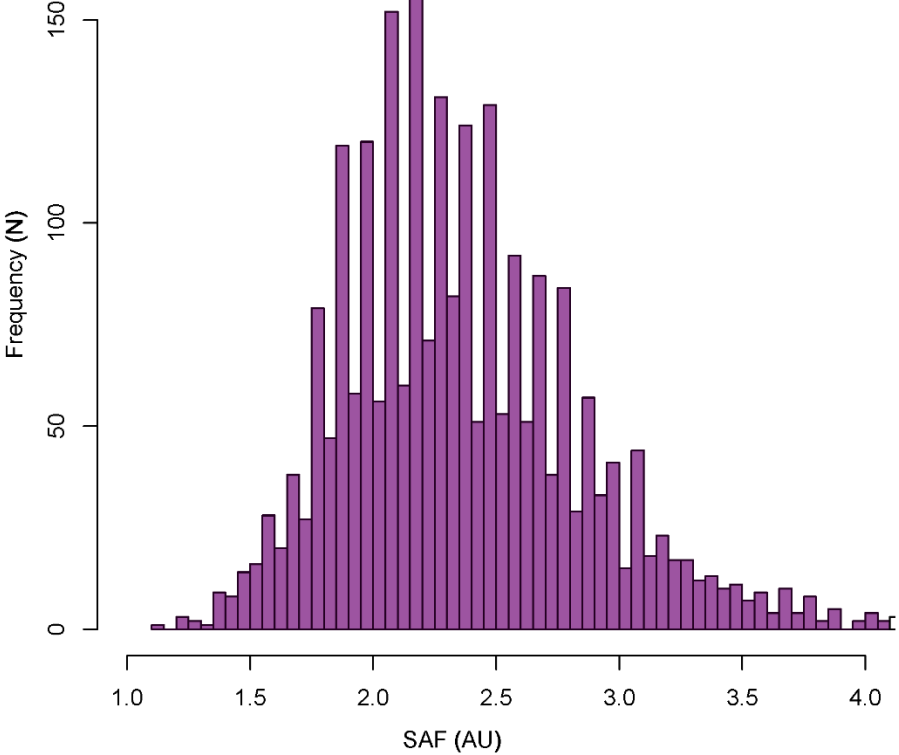



**ESM Fig. 2** Association of skin autofluorescence (SAF) with parameters of left ventricular systolic and diastolic function in men and women by diabetes status

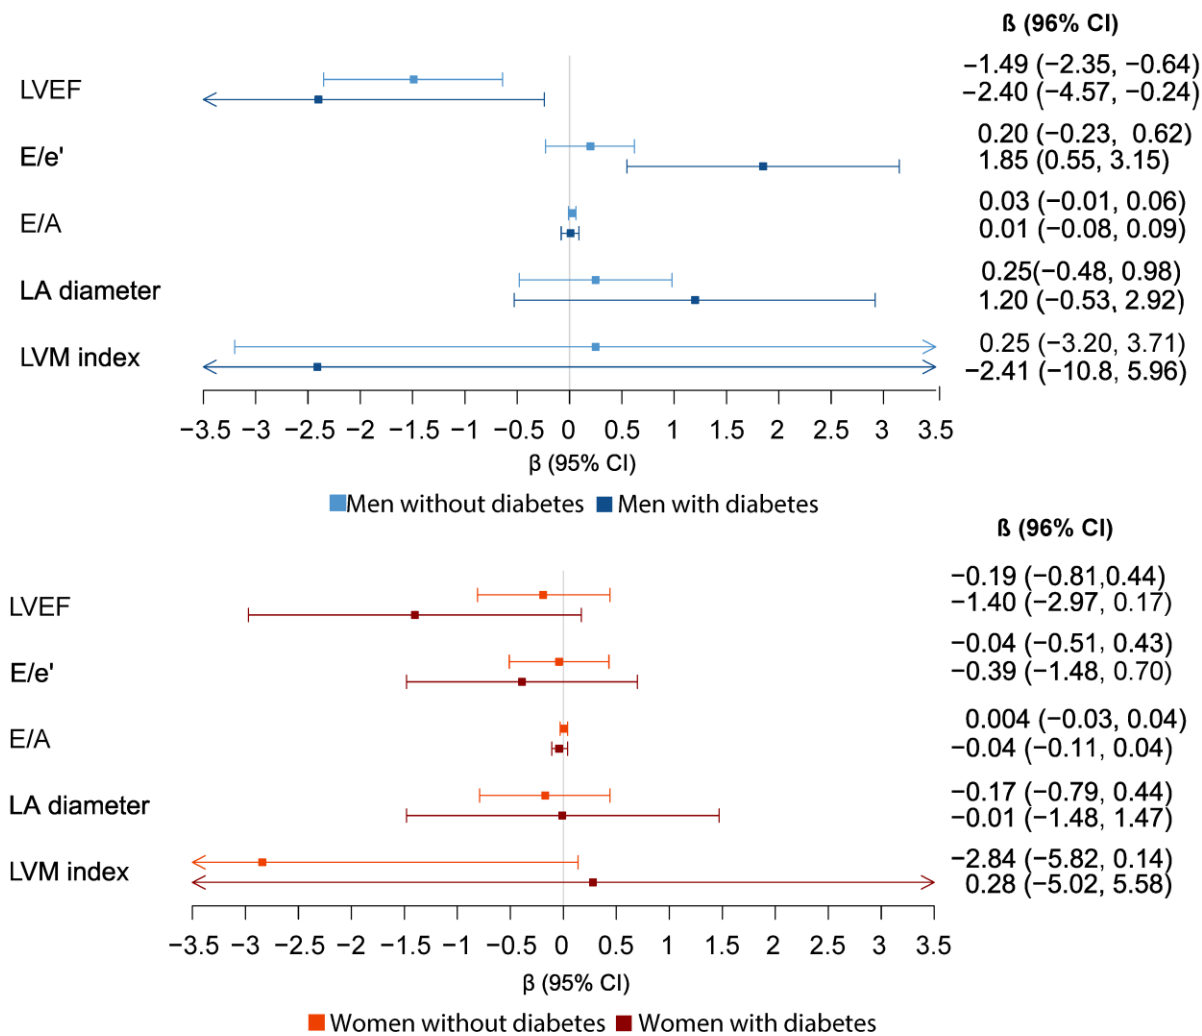

Mean differences ( $\beta$ ) (95% CI) for one unit increase in SAF were calculated using linear regressions adjusted for age, CHD, hypertension, smoking status, waist circumference, monthly income and physical activity

The number of men with and without diabetes in the analyses was 171 and 783, respectively

The number of women with and without diabetes in the analyses was 186 and 1222, respectively

LVEF: Left ventricular ejection fraction, E/e': E wave/ septal e' ratio, E/A; mitral E wave/A wave ratio, LA diameter: left atrial diameter, LVM index; left ventricular mass index
